# Supplementary material for: Genomic Data Mining Reveals Abundant Uncharacterized Transporters in Coccidioides immitis and Coccidioides posadasii
Source: MDPI journal article supplement (doi:10.3390/jof8101064), 2022-10-10
Supplement: s1 [file s1]

**Supplementary Table S2.** Counts of seven classes of transporter proteins according to substrate type in *Coccidioides immitis*. Transporters without identified substrate were excluded.

| Substrate                                | No. of transporters (class) acting on substrate type |                     |                       |                        |                                          |                       |                                    | Total |
|------------------------------------------|------------------------------------------------------|---------------------|-----------------------|------------------------|------------------------------------------|-----------------------|------------------------------------|-------|
|                                          | 1. Channels & Pores                                  | 2. Primary Carriers | 3. Secondary Carriers | 4. Group translocators | 5. Trans-membrane electron flow carriers | 8. Auxiliary proteins | 9. (Putative) Poorly characterized |       |
| 1. Inorganic molecules (283)             |                                                      |                     |                       |                        |                                          |                       |                                    |       |
| A. Cation                                | 20                                                   | 106                 | 77                    | 0                      | 4                                        | 0                     | 4                                  | 211   |
| B. Anion                                 | 2                                                    | 34                  | 1                     | 4                      | 0                                        | 0                     | 0                                  | 41    |
| C. electrons                             | 0                                                    | 3                   | 2                     | 0                      | 4                                        | 1                     | 0                                  | 10    |
| D. other                                 | 15                                                   | 6                   | 0                     | 0                      | 0                                        | 0                     | 0                                  | 21    |
| 2. Carbon sources (128)                  |                                                      |                     |                       |                        |                                          |                       |                                    |       |
| A. Sugars & polyols                      | 0                                                    | 38                  | 0                     | 6                      | 0                                        | 0                     | 8                                  | 52    |
| B. carboxylates                          | 1                                                    | 48                  | 1                     | 1                      | 0                                        | 0                     | 0                                  | 51    |
| C. Organoanion                           | 0                                                    | 2                   | 0                     | 0                      | 0                                        | 0                     | 0                                  | 2     |
| D. Aromatic compounds                    | 1                                                    | 18                  | 4                     | 0                      | 0                                        | 0                     | 0                                  | 23    |
| 3. Amino acids & their derivatives (157) |                                                      |                     |                       |                        |                                          |                       |                                    |       |
| A. Amino acids                           | 0                                                    | 72                  | 2                     | 0                      | 0                                        | 0                     | 0                                  | 74    |
| B. Amines, amides, & organocations       | 1                                                    | 33                  | 6                     | 1                      | 0                                        | 0                     | 1                                  | 42    |
| C. Peptides                              | 0                                                    | 15                  | 20                    | 0                      | 0                                        | 6                     | 0                                  | 41    |
| 4. Vitamins and cofactors (37)           |                                                      |                     |                       |                        |                                          |                       |                                    |       |
| A. Vitamins                              | 2                                                    | 28                  | 0                     | 0                      | 0                                        | 0                     | 0                                  | 30    |
| B. Cofactors                             | 2                                                    | 3                   | 0                     | 0                      | 0                                        | 1                     | 0                                  | 6     |
| C. Siderophores                          | 0                                                    | 1                   | 0                     | 0                      | 0                                        | 0                     | 0                                  | 1     |
| 5. Drugs, dyes, sterols & toxins (76)    |                                                      |                     |                       |                        |                                          |                       |                                    |       |
| A. Drugs                                 | 0                                                    | 44                  | 24                    | 0                      | 0                                        | 0                     | 0                                  | 68    |
| B. Pigments & dyes                       | 0                                                    | 0                   | 4                     | 0                      | 0                                        | 0                     | 0                                  | 4     |
| C. Sterols                               | 0                                                    | 0                   | 2                     | 0                      | 0                                        | 0                     | 2                                  | 4     |
| 6. Macromolecules (282)                  |                                                      |                     |                       |                        |                                          |                       |                                    |       |
| A. Carbohydrates                         | 0                                                    | 0                   | 0                     | 3                      | 0                                        | 0                     | 0                                  | 3     |
| B. Proteins                              | 40                                                   | 1                   | 128                   | 0                      | 0                                        | 9                     | 23                                 | 201   |
| C. Lipids                                | 4                                                    | 20                  | 9                     | 19                     | 0                                        | 0                     | 15                                 | 67    |
| D. other macromolecules                  | 9                                                    | 2                   | 0                     | 0                      | 0                                        | 0                     | 0                                  | 11    |
| 7. Nucleic acids (99)                    |                                                      |                     |                       |                        |                                          |                       |                                    |       |
| A. Nucleic acids & derivatives           | 38                                                   | 33                  | 18                    | 0                      | 0                                        | 0                     | 10                                 | 99    |
| 8. Others (47)                           |                                                      |                     |                       |                        |                                          |                       |                                    |       |
|                                          | 27                                                   | 16                  | 3                     | 0                      | 0                                        | 0                     | 1                                  | 47    |
