# Supplementary material for: Genomic Data Mining Reveals Abundant Uncharacterized Transporters in Coccidioides immitis and Coccidioides posadasii
Source: MDPI journal article supplement (doi:10.3390/jof8101064), 2022-10-10
Supplement: s1 [file s1]

**Supplementary Table S3.** Counts of seven classes of transporter proteins according to substrate type in *Coccidioides posadasii*. Transporters without identified substrates were excluded.

| Substrate                                | No. of transporters (class) acting on substrate type |                     |                       |                        |                                          |                       |                                    | Total |
|------------------------------------------|------------------------------------------------------|---------------------|-----------------------|------------------------|------------------------------------------|-----------------------|------------------------------------|-------|
|                                          | 1. Channels & Pores                                  | 2. Primary Carriers | 3. Secondary Carriers | 4. Group translocators | 5. Trans-membrane electron flow carriers | 8. Auxiliary proteins | 9. (Putative) Poorly characterized |       |
| 1. Inorganic molecules (267)             |                                                      |                     |                       |                        |                                          |                       |                                    |       |
| A. Cation                                | 20                                                   | 97                  | 74                    | 0                      | 4                                        | 0                     | 4                                  | 199   |
| B. Anion                                 | 2                                                    | 31                  | 1                     | 4                      | 0                                        | 0                     | 0                                  | 38    |
| C. electrons                             | 0                                                    | 3                   | 2                     | 0                      | 4                                        | 1                     | 0                                  | 10    |
| D. other                                 | 15                                                   | 5                   | 0                     | 0                      | 0                                        | 0                     | 0                                  | 20    |
| 2. Carbon sources (125)                  |                                                      |                     |                       |                        |                                          |                       |                                    |       |
| A. Sugars & polyols                      | 0                                                    | 42                  | 0                     | 6                      | 0                                        | 0                     | 4                                  | 52    |
| B. carboxylates                          | 1                                                    | 48                  | 1                     | 1                      | 0                                        | 0                     | 0                                  | 51    |
| C. Organoanion                           | 0                                                    | 2                   | 0                     | 0                      | 0                                        | 0                     | 0                                  | 2     |
| D. Aromatic compounds                    | 1                                                    | 15                  | 4                     | 0                      | 0                                        | 0                     | 0                                  | 20    |
| 3. Amino acids & their derivatives (151) |                                                      |                     |                       |                        |                                          |                       |                                    |       |
| A. Amino acids                           | 0                                                    | 70                  | 2                     | 0                      | 0                                        | 0                     | 0                                  | 72    |
| B. Amines, amides, & organocations       | 1                                                    | 38                  | 5                     | 1                      | 0                                        | 0                     | 1                                  | 46    |
| C. Peptides                              | 0                                                    | 14                  | 13                    | 0                      | 0                                        | 6                     | 0                                  | 33    |
| 4. Vitamins and cofactors (36)           |                                                      |                     |                       |                        |                                          |                       |                                    |       |
| A. Vitamins                              | 2                                                    | 28                  | 0                     | 0                      | 0                                        | 0                     | 0                                  | 30    |
| B. Cofactors                             | 2                                                    | 3                   | 0                     | 0                      | 0                                        | 0                     | 0                                  | 5     |
| C. Siderophores                          | 0                                                    | 1                   | 0                     | 0                      | 0                                        | 0                     | 0                                  | 1     |
| 5. Drugs, dyes, sterols & toxins (74)    |                                                      |                     |                       |                        |                                          |                       |                                    |       |
| A. Drugs                                 | 0                                                    | 43                  | 24                    | 0                      | 0                                        | 0                     | 0                                  | 67    |
| B. Pigments & dyes                       | 0                                                    | 0                   | 4                     | 0                      | 0                                        | 0                     | 0                                  | 4     |
| C. Sterols                               | 0                                                    | 0                   | 2                     | 0                      | 0                                        | 0                     | 1                                  | 3     |
| 6. Macromolecules (272)                  |                                                      |                     |                       |                        |                                          |                       |                                    |       |
| A. Carbohydrates                         | 0                                                    | 0                   | 0                     | 3                      | 0                                        | 0                     | 0                                  | 3     |
| B. Proteins                              | 38                                                   | 1                   | 124                   | 0                      | 0                                        | 9                     | 23                                 | 195   |
| C. Lipids                                | 3                                                    | 17                  | 9                     | 21                     | 0                                        | 0                     | 13                                 | 63    |
| D. other macromolecules                  | 9                                                    | 2                   | 0                     | 0                      | 0                                        | 0                     | 0                                  | 11    |
| 7. Nucleic acids (92)                    |                                                      |                     |                       |                        |                                          |                       |                                    |       |
| A. Nucleic acids & derivatives           | 37                                                   | 27                  | 18                    | 0                      | 0                                        | 0                     | 10                                 | 92    |
| 8. Others (49)                           |                                                      |                     |                       |                        |                                          |                       |                                    |       |
|                                          | 26                                                   | 19                  | 3                     | 0                      | 0                                        | 0                     | 1                                  | 49    |
